# Supplementary material for: Postbiotics from Lactobacillus delbrueckii Alleviate Intestinal Inflammation by Promoting the Expansion of Intestinal Stem Cells in S. Typhimurium-Induced Mice
Source: MDPI journal article supplement (doi:10.3390/foods13060874), 2024-03-14
Supplement: s1 [file s1]

## Supplementary table S1

**Table S1.** List of primers used in the present study

| Primers            | Forward primer (5'-3')      | Reverse primer (5'-3')     |
|--------------------|-----------------------------|----------------------------|
| <i>m-GAPDH</i>     | F: AGGCCGGTGCTGAGTATGTC     | R: GGC GGAGATGATGACCCTT    |
| <i>m-Occludin</i>  | F: ATCGTGGCTTTTGCTTTAATCATC | R: GGGCTGTTCATCATAAATGTGTT |
| <i>m-ZO-1</i>      | F: ACCGAAACCTGTGTATGCTC     | R: ATCATTTCCACCAGCTAGTCG   |
| <i>m-Claudin-1</i> | F: TGGGAGGTGTCCTACTTTTCCT   | R: TTCCGATAACCATCATCAACAG  |
| <i>m-PCNA</i>      | F: TGCTCTGAGGTACCTGAACCT    | R: TGCTTCCTCATCTTCAATCT    |
| <i>m-Ki67</i>      | F: ACCGTGGAGTAGTTTATCTG     | R: TGTTTCCAGTCCGCTTACTT    |
| <i>m-Cyclin</i>    | F: CATGTATCATCTAGCCATGCA    | R: ATGCACAACAGGCCGCTAC     |
| <i>m-Lgr5</i>      | F: CCTTCACAGCCTCAAAGTG      | R: GCAGGGATTGAAGGCTTCT     |
| <i>m-Muc2</i>      | F: ACGATGCCTACACCAAGGTC     | R: TGATCTTCTGCATGTTCCCA    |
| <i>m-Lyz1</i>      | F: AGGAATGGAATGGATGGCTA     | R: CGGTCTCCACGGTTGTATT     |
| <i>m-Wnt3a</i>     | F: CTCGCTGGCTACCCAATTG      | R: CTTACACCTTCTGCTACG      |
| <i>m-Bmi1</i>      | F: TTCATTGTCTTTTCCGCCCG     | R: AGTACCCTCCACACAGGAC     |
| <i>p-GAPDH</i>     | F: CCTATAGCCGTCCATGCCAG     | R: CCTATAGCCGTCCATGCCAG    |
| <i>p-PCNA</i>      | F: TACGCTAAGGGCAGAAGATAATG  | R: CTGAGATCTCGGCATATACGTG  |
| <i>p-Cyclin</i>    | F: GCCCTCCGTGTCCTACTTCA     | R: AGACCTCCTCCTCGCACTTCT   |
| <i>p-Lgr5</i>      | F: GCCTTTGTAGGCAACCTTC      | R: AGGCACCATTCAAAGTCAGTG   |
| <i>p-Muc2</i>      | F: AGACGGGCGGAGACTTTGAATC   | R: CTTGGATGGGAACGCTGGGATA  |
| <i>p-Lyz1</i>      | F: CCCGGCTTCTCAGACAACAT     | R: CCTATAGCCGTCCATGCCAG    |
| <i>p-Wnt3a</i>     | F: GAGTGCCAACACCAGTTCC      | R: AGTCACAGCGAAGGCAACTC    |
